# Supplementary material for: Room-temperature solution synthesis of ZnMn2O4 nanoparticles for advanced electrochemical lithium storage
Source: Royal Society of Chemistry journal article supplement (doi:10.1039/c9ra00553f), 2019-01-01
Supplement: c9ra00553f1.pdf [file c9ra00553f1.pdf]

# Room-Temperature Solution Synthesis of $\text{ZnMn}_2\text{O}_4$ nanoparticles for advanced electrochemical lithium storage

Chunhui Wang,<sup>a†</sup> Chunxian Zhou,<sup>a†</sup> Bao Zhang,<sup>a</sup> Xing Ou,<sup>a\*</sup> Liang Cao,<sup>a</sup> Chunli Peng<sup>b</sup> and Jiafeng Zhang<sup>a</sup>

<sup>a</sup>*School of Metallurgy and Environment, Central South University, Changsha 410083, PR China*

<sup>b</sup>*School of Energy Science and Engineering, Central South University, Changsha 410083, PR China*

<sup>†</sup> *These authors contributed equally and mainly to this study*

## Experiments:

### Synthesis of $\text{ZnMn}_2\text{O}_4$ nano-particles

All chemicals utilized in this work were of analytical grade and were used without further purification. Easily, ZnO and MnO hybrid materials (molar ratio: 3:1), mixed by ball mill, were poured into 5 M KOH aqueous solution with continuously stirring for 24 h at room temperature. Finally, the products were washed with deionized water and ethyl alcohol for several times before drying overnight in air oven at 60 °C. For comparison, the raw samples of ZnO and MnO are also as the electrodes for Li-ion battery to be measured.

### Material characterizations

The phases of as-prepared  $\text{ZnMn}_2\text{O}_4$  materials and the two raw samples were investigated by XRD on a Rigaku diffractometer (D/Max2500) with Cu  $K\alpha$  ( $\lambda=1.5406$  Å) radiation at 40 kV and 250 mA, meanwhile, the phases were further verified by the Raman and X-ray photoelectron spectroscopy. The morphological and the crystal structure were characterized by SEM, TEM and HRTEM.

## Electrochemical characterizations

The anode slurry was carried out with  $\text{ZnMn}_2\text{O}_4$  (or  $\text{ZnO}$ ,  $\text{MnO}$ ), acetylene black, and carboxymethyl cellulose sodium at a mass ratio of 7:2:1 and was casted on copper foil with doctor blade. The loading of active material is  $1.0\text{-}1.2\text{ mg cm}^{-2}$ . The batteries of CR2025-type coin cells were assembled in Ar-filled glovebox with lithium as counter and reference electrodes. The electrolyte was a solution of 1 M  $\text{LiPF}_6$  dissolved in ethylene carbonate, ethylmethyl carbonate and dimethyl carbonate (1:1:1 v/v/v). Celgard 2400 membrane was used as a separator. Discharge/charge measurements were characterized at the potential range of 0.01-3.00 V (vs.  $\text{Li/Li}^+$ ) with LAND battery test system (CT2001A) at the room temperature of  $25^\circ\text{C}$ . EIS in a frequency from 10 mHz to 100 KHz and cyclic voltammetry (CV) at a scanning rate of  $0.1\text{ mV s}^{-1}$  between 0.01 and 3.00 V were tested on a CHI660E electrochemical workstation.

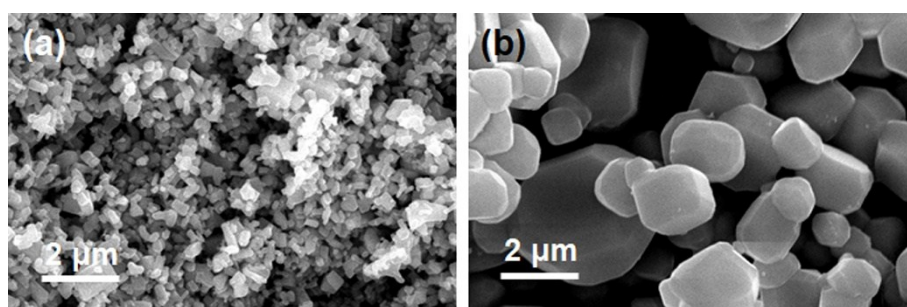

Figure S1 The morphology of  $\text{ZnO}$  (a) and  $\text{MnO}$  (b).

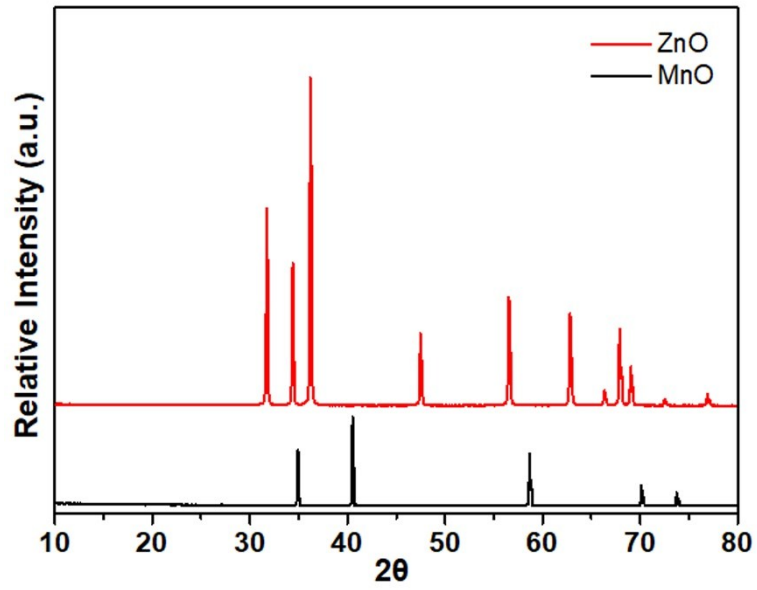

Figure S2 The XRD patterns of ZnO and MnO materials.

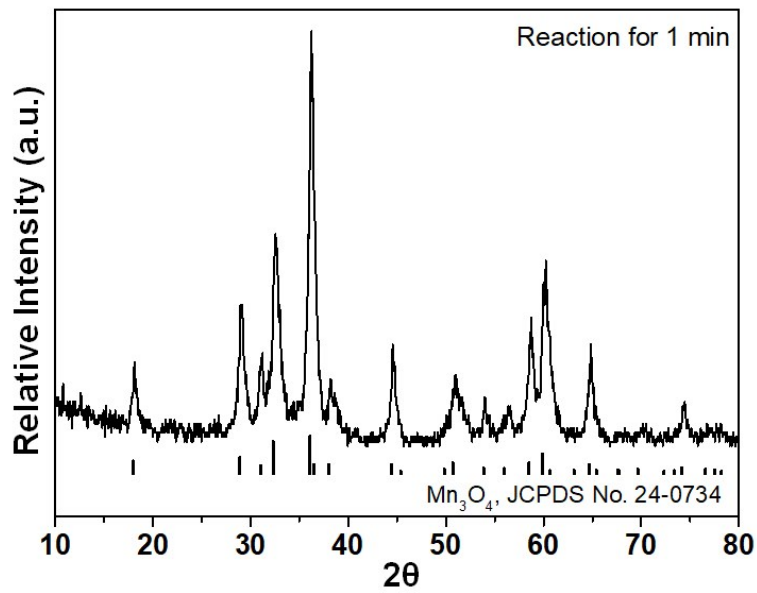

Figure S3 The XRD results of the reaction for 1 min.

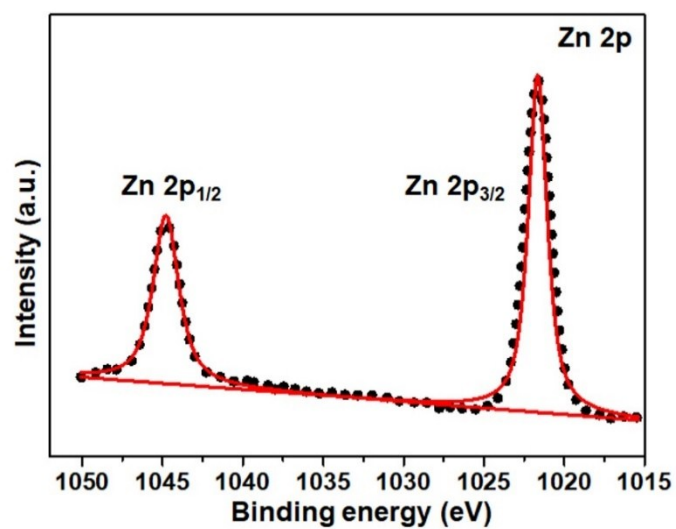

Figure S4 The XPS spectrum of Zn 2p.

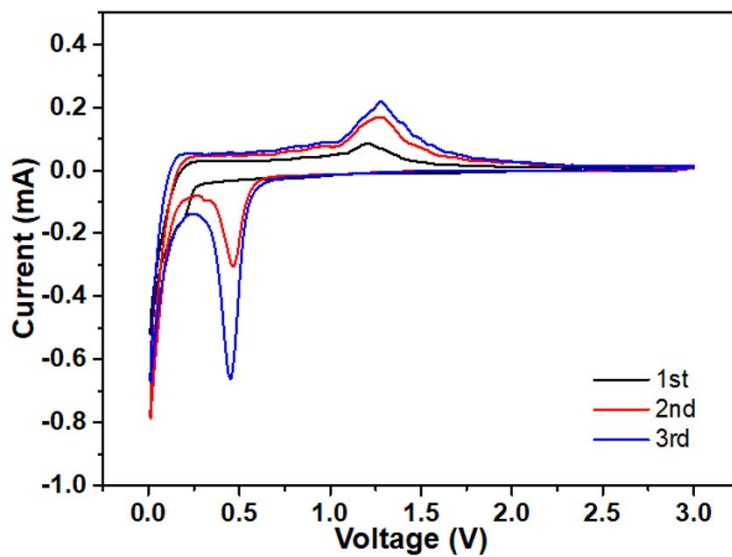

Figure S5 The CV results of MnO.

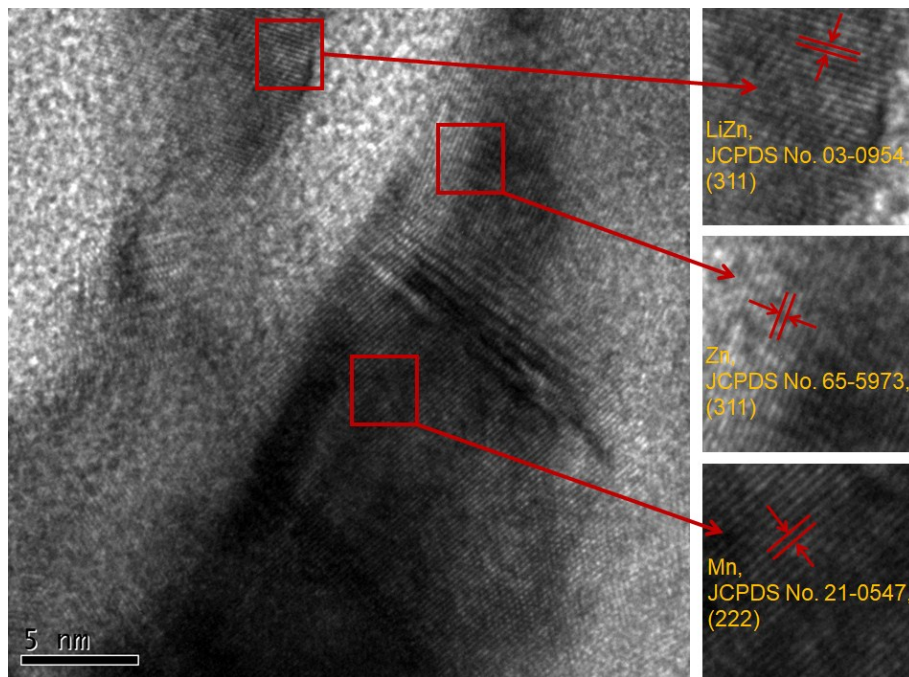

Figure S6 The HRTEM results of ZnMn<sub>2</sub>O<sub>4</sub> after discharging to 0.01 V.
